# Supplementary material
Source: publisher site journal article supplement (https://kjim.org/upload/media/kjim-2023-265-Supplementary-Table-3.pdf)
Supplement: Supplementary file 1 [file kjim-2023-265-Supplementary-Table-3.pdf]

**Supplementary Table 3. Causes of early R-CHOP treatment discontinuation in the 58 patients**

| Causes                                                                                                 | Value     |
|--------------------------------------------------------------------------------------------------------|-----------|
| Treatment-related toxicities                                                                           | 43 (74.1) |
| Fatigue (grade 3)                                                                                      | 19 (44.2) |
| Infections not related to neutropenia (grade 3–5)                                                      | 10 (23.3) |
| Febrile neutropenia (grade 3–5)                                                                        | 10 (23.3) |
| Bowel perforation/bleeding (grade 4–5)                                                                 | 2 (4.7)   |
| Congestive heart failure (grade 3)                                                                     | 1 (2.3)   |
| Autonomic neuropathy (grade 3)                                                                         | 1 (2.3)   |
| Disease progression                                                                                    | 8 (13.8)  |
| Adverse events presumably not related to lymphoma progression or to treatment toxicities <sup>a)</sup> | 4 (6.9)   |
| Follow-up loss                                                                                         | 3 (5.2)   |

Values are presented as number (%).

<sup>a)</sup>Included acute coronary syndrome (n = 1), fatal pulmonary embolism (n = 1), small bowel adhesive ileus and following surgery that were not related to underlying lymphoma (n = 1), and femur neck fracture (n = 1).
